# Supplementary material
Source: Springer Nature journal article supplement (https://www.springermedizin.de/resource/supplementary/12884_2014_1211_MOESM1_ESM.pdf/9459218)
Supplement: MOESM1 [file 9459218]

Women reporting pregnancy  
outcomes between  
Dec 2007 and June 2011  
n=42,796

Women with induced or  
spontaneous abortions  
Induced abortion, n=10,406  
Spontaneous  
abortion, n=4,891  
**Total, n=15,297 (35.7%)**

Women with live births  
or stillbirths  
Live birth, n=26,320  
Stillbirth, n=1,216  
**Total, n=27,499 (64.3%)**

Not met, n=196  
Refused, n=113  
Permanently  
moved, n=12  
Died, n=3  
**Total, n=324 (2.0%)**

Not met, n=204  
Refused, n=25  
Permanently moved,  
n=9  
Died, n=20  
**Total, n=258 (1.0%)**

**Women who  
completed interviews  
1 month after  
pregnancy outcomes  
n=14,973 (98.0%)**

**Women who  
completed birth  
assessment forms or  
1-month postpartum  
interviews  
n=27,241 (99.1%)**
